# Supplementary material for: Ventricular–vascular coupling is predictive of adverse clinical outcome in paediatric pulmonary arterial hypertension
Source: PubMed Central journal article supplement — Open Heart. 2021 Sep 28;8(2):e001611. doi: 10.1136/openhrt-2021-001611 (PMC8479945; doi:10.1136/openhrt-2021-001611), 2021-09-28
Supplement: openhrt-2021-001611supp002.pdf [file openhrt-2021-001611supp002.pdf]

## **Ventricular-Vascular coupling is predictive of adverse clinical outcome in pediatric pulmonary arterial hypertension**

Melanie J Dufva<sup>1,2</sup>, D Dunbar Ivy<sup>2</sup>, Kristen Campbell<sup>3</sup>, Aimee Lam<sup>1,2</sup>, Adam Rauff<sup>1,4</sup>, Karel TN Breeman<sup>2,5</sup>, Johannes M Douwes<sup>2,5</sup>, Rolf MF Berger<sup>5</sup>, Vitaly O Kheyfets<sup>1,2</sup>, Kendall Hunter<sup>1,2</sup>

<sup>1</sup>Department of Bioengineering, University of Colorado Denver, Denver, CO, USA

<sup>2</sup>Department of Pediatrics, Section of Cardiology, Childrens Hospital Colorado, Aurora, CO, USA

<sup>3</sup>Department of Pediatrics, School of Medicine, University of Colorado Anschutz Medical Campus, Aurora, CO, USA

<sup>4</sup>Department of Biomedical Engineering, University of Utah, Salt Lake City, UT, USA

<sup>5</sup>Center for Congenital Heart Diseases, Department of Paediatric Cardiology, Beatrix Children's Hospital, University Medical Center Groningen, University of Groningen, The Netherlands

### **Corresponding Author:**

Kendall Hunter, PhD  
Assistant Professor  
University of Colorado Denver  
Department of Bioengineering  
kendall.hunter@ucdenver.edu  
12700 E. 19<sup>th</sup> Ave  
Aurora, CO 80045-2560  
Tel: 913-568-4408  
Fax: 303-724-5800

## **Supplementary Material**

**Table S1: Soft Event Demographics**

| Variable                   | No Soft Event (n=60) | Soft Event (n=70) | P-value       |
|----------------------------|----------------------|-------------------|---------------|
| Gender                     |                      |                   | 0.8338        |
| Female                     | 31 (52%)             | 38 (55%)          |               |
| Male                       | 29 (48%)             | 31 (45%)          |               |
| Age at Cath                | 7.85±6.48            | 9.86±6.09         | 0.0727        |
| Etiology                   |                      |                   | 0.1874        |
| IPAH/HPAH                  | 23 (38%)             | 36 (51%)          |               |
| APAH                       | 37 (62%)             | 34 (49%)          |               |
| Time To Follow-up or Event | 4.52±2.91            | 4.75±2.84         | 0.6514        |
| VVCR_K                     | 1.53±0.58            | 1.63±0.65         | 0.335         |
| VVCR_T                     | 0.89±0.45            | 0.98±0.7          | 0.3562        |
| PVRi, Pa·s/m <sup>3</sup>  | 6.4±4.86             | 10.15±9.07        | <b>0.0033</b> |

Data is expressed as mean values (standard deviation), n (%), unless otherwise noted. VVCR\_K, vascular-ventricular coupling ratio Kind method; VVCR\_T, vascular-ventricular coupling Takeuchi method; PVRi, indexed pulmonary vascular resistance.

### Figures

**Figure S1.** Linear regression plots between PVRi and  $E_{es}/E_{a\_}$ (Takeuchi) (left,  $r=-0.27$ ) and  $E_{es}/E_{a\_}$ (Kind) (right,  $r=-0.16$ ).
