# Supplementary figures and images for: Ventricular–vascular coupling is predictive of adverse clinical outcome in paediatric pulmonary arterial hypertension
Source: PubMed Central journal article supplement — Open Heart. 2021 Sep 28;8(2):e001611. doi: 10.1136/openhrt-2021-001611 (PMC8479945; doi:10.1136/openhrt-2021-001611), 2021-09-28

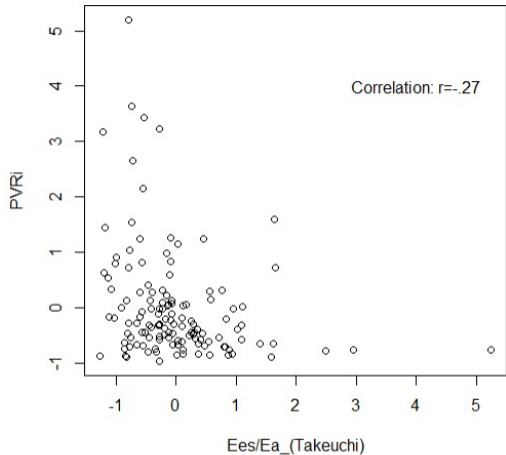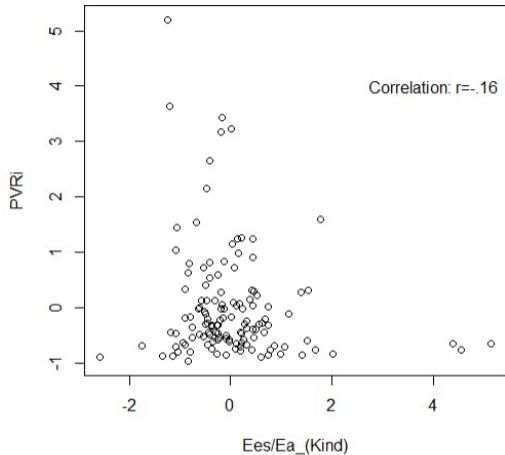

Supplement: openhrt-2021-001611supp001.pdf [file openhrt-2021-001611supp001.pdf]
